# Supplementary material
Source: PubMed Central journal article supplement (PMC9236595)
Supplement: NIHMS1815147-supplement-Supplementary_Material.pdf [file NIHMS1815147-supplement-Supplementary_Material.pdf]

## **Supplemental Information**

Associations of mismatch negativity with psychotic symptoms and functioning  
transdiagnostically across psychotic disorders

Kayla R. Donaldson, Keisha D. Novak, Dan Foti, Maya Marder, Greg Perlman, Roman Kotov\*,

Aprajita Mohanty\*

\*Joint last author

## **Methods**

### **Study Inclusion**

Participants in the clinical cohort were recruited at first hospital admission and followed up longitudinally; data in the present analyses were collected in the 20<sup>th</sup> year of the study.

Inclusion criteria for age-, gender-, and race-matched neighbors included no history of psychotic disorder or psychiatric hospitalization; non-psychotic Axis I diagnoses were not considered an exclusionary criterion.

### **Clinical Ratings**

Symptoms were assessed using the Scale for the Assessment of Positive Symptoms (SAPS; Andreasen, 1984) and the Scale for the Assessment of Negative Symptoms (SANS; Andreasen, 1989). Functioning was assessed using clinician-administered interviews. Measures of cognitive functioning utilized in the present analyses were determined through a neuropsychological testing battery, including tests of executive functioning and working memory (Stroop: Trenerry, 1989; Trails-B: Reitan, 1955), attention (Trails-A; Reitan, 1992), episodic memory (assessed through the visual and auditory modalities; Wechsler, 1987), and overall academic abilities (as measured by the WRAT-3; Wilkinson, 1993). Interviews and assessments

were conducted by a clinical psychologist, psychiatrist, or trained interviewer, and diagnostic consensus was reached by staff psychiatrists.

### References

- Andreasen, N. C. (1984). *Scale for the assessment of positive symptoms (SAPS)*: University of Iowa Iowa City.
- Andreasen, N. C. (1989). The Scale for the Assessment of Negative Symptoms (SANS): conceptual and theoretical foundations. *The British Journal of Psychiatry*, 155(S7), 49-52.
- Reitan, R. M. (1992). *Trail Making Test: Manual for administration and scoring*: Reitan Neuropsychology Laboratory.
- Reitan, R. M. (1955). The relation of the trail making test to organic brain damage. *Journal of consulting psychology*, 19(5), 393.
- Trenerry, M. R., Crosson, B., DeBoe, J., & Leber, W. R. (1989). Stroop neuropsychological screening test. *Psychological Assessment Resources*.
- Wechsler, D. (1987). *Manual for Wechsler Memory Scale-Revised*. Psychological Corporation. San Antonio, Tex, USA.
- Wilkinson, G. S. (1993). *WRAT-3: Wide range achievement test administration manual*: Wide Range, Incorporated.

**Tables***Supplemental Table 1. Comparison of Correlations in Cases*

|                                       | Frequency<br>MMN | Duration<br>MMN | Fishers r to z |
|---------------------------------------|------------------|-----------------|----------------|
| <i>Symptoms</i>                       |                  |                 |                |
| Auditory Hallucinations               | -.03             | .14*            | 2.17*          |
| SAPS-D                                | .01              | .14*            | 1.65*          |
| <i>Real-world Functioning</i>         |                  |                 |                |
| Occupational Functioning              | .20**            | .10             | 1.28           |
| <i>Neuropsychological Functioning</i> |                  |                 |                |
| Episodic Memory                       | -                | -               |                |
| Visual                                | -.22**           | -.11            | -1.42          |
| Auditory                              | -.15*            | -.04            | -1.40          |
| Cognitive/Academic Ability            | -                | -               |                |
| WRAT 3                                | -.16*            | -.11            | -0.64          |

\*Indicates  $p < .05$  difference between correlation coefficients

*Supplemental Table 2. Frequency Hierarchical Regression*

| Model                    | Predictors                | $R^2$ | $\Delta R^2$ | $p$ value |
|--------------------------|---------------------------|-------|--------------|-----------|
| <i>Functioning</i>       |                           |       |              |           |
| Occupational Functioning | Demographics <sup>1</sup> | .02   | .02          | .215      |
|                          | Functioning               | .04   | .03          | .015*     |
|                          | Diagnosis                 | .05   | .00          | .590      |
|                          | Interaction               | .05   | .00          | .609      |
| <i>Cognition</i>         |                           |       |              |           |
| Auditory Episodic Memory | Demographics              | .01   | .01          | .274      |
|                          | Auditory EM               | .03   | .02          | .057      |
|                          | Diagnosis                 | .03   | .00          | .777      |
|                          | Interaction               | .06   | .03          | .068      |
| Visual Episodic Memory   | Demographics              | .01   | .01          | .259      |
|                          | Visual EM                 | .05   | .04          | .004**    |
|                          | Diagnosis                 | .06   | .00          | .804      |
|                          | Interaction               | .07   | .01          | .266      |
| Trails B                 | Demographics              | .02   | .02          | .152      |
|                          | Trails B                  | .03   | .01          | .138      |
|                          | Diagnosis                 | .03   | .00          | .906      |
|                          | Interaction               | .03   | .00          | .922      |
| Stroop                   | Demographics              | .02   | .02          | .194      |
|                          | Stroop                    | .03   | .02          | .081      |
|                          | Diagnosis                 | .03   | .00          | .858      |
|                          | Interaction               | .04   | .00          | .755      |
| WRAT 3                   | Demographics              | .01   | .01          | .241      |
|                          | WRAT 3                    | .03   | .02          | .038*     |
|                          | Diagnosis                 | .04   | .00          | .882      |
|                          | Interaction               | .05   | .01          | .293      |

<sup>1</sup>Consisting of gender and antipsychotic medication use, the two demographic variables on which these groups differed significantly; \*  $p < .05$ ; \*\*  $p < .01$

*Supplemental Table 3. Duration Hierarchical Regression*

| Model                      | Predictors                | $R^2$ | $\Delta R^2$ | $p$ value |
|----------------------------|---------------------------|-------|--------------|-----------|
| <i>Symptoms</i>            |                           |       |              |           |
| SAPS D                     | Demographics <sup>1</sup> | .00   | .00          | .749      |
|                            | SAPS-D                    | .02   | .02          | .043*     |
|                            | Diagnosis                 | .03   | .01          | .399      |
|                            | Interaction               | .03   | .00          | .716      |
| Auditory<br>Hallucinations | Demographics              | .00   | .00          | .762      |
|                            | AH                        | .02   | .02          | .051      |
|                            | Diagnosis                 | .03   | .01          | .382      |
|                            | Interaction               | .04   | .01          | .361      |
| <i>Cognition</i>           |                           |       |              |           |
| Trails B                   | Demographics              | .00   | .00          | .669      |
|                            | Trails B                  | .02   | .02          | .048*     |
|                            | Diagnosis                 | .03   | .01          | .388      |
|                            | Interaction               | .04   | .00          | .800      |
| Stroop                     | Demographics              | .01   | .01          | .591      |
|                            | Stroop                    | .03   | .03          | .022*     |
|                            | Diagnosis                 | .04   | .01          | .430      |
|                            | Interaction               | .04   | .00          | .967      |

<sup>1</sup>Consisting of gender and antipsychotic medication use, the two demographic variables on which these groups differed significantly; \*  $p < .05$

*Supplemental Table 4. Hierarchical Regression Across Populations*

| Model                | Predictors  | $R^2$ | $\Delta R^2$ | $p$ value |
|----------------------|-------------|-------|--------------|-----------|
| <i>Frequency MMN</i> |             |       |              |           |
| Visual EM            | Group       | .02   | .02          | .003**    |
|                      | Visual EM   | .06   | .04          | .000***   |
|                      | Interaction | .06   | .00          | .421      |
| Auditory EM          | Group       | .02   | .02          | .003**    |
|                      | Auditory EM | .04   | .02          | .002**    |
|                      | Interaction | .04   | .00          | .817      |
| Trails B             | Group       | .02   | .02          | .006**    |
|                      | Trails B    | .04   | .03          | .001**    |
|                      | Interaction | .04   | .00          | .310      |
| Trails A             | Group       | .02   | .02          | .003**    |
|                      | Trails A    | .03   | .01          | .011*     |
|                      | Interaction | .04   | .00          | .259      |
| Stroop               | Group       | .02   | .02          | .009**    |
|                      | Stroop      | .05   | .03          | .000***   |
|                      | Interaction | .05   | .00          | .222      |
| <i>Duration MMN</i>  |             |       |              |           |
| Visual EM            | Group       | .03   | .03          | .000***   |
|                      | Visual EM   | .05   | .02          | .005*     |
|                      | Interaction | .05   | .00          | .241      |
| Auditory EM          | Group       | .03   | .03          | .000***   |
|                      | Auditory EM | .05   | .01          | .013*     |
|                      | Interaction | .05   | .01          | .050*     |
| Trails B             | Group       | .03   | .03          | .000***   |
|                      | Trails B    | .04   | .01          | .012*     |
|                      | Interaction | .04   | .00          | .772      |
| Stroop               | Group       | .03   | .03          | .000***   |
|                      | Stroop      | .08   | .04          | .000***   |
|                      | Interaction | .08   | .01          | .070      |

\*  $p < .05$ ; \*\*  $p < .01$ ; \*\*\*  $p < .001$
